1 HORNET: Tools to find genes with causal  
2 evidence and their regulatory networks using  
3 eQTLs

4 Noah Lorincz-Comi<sup>1\*</sup>, Yihe Yang<sup>1</sup>, Jayakrishnan  
5 Ajayakumar<sup>1</sup>, Makaela Mews<sup>1</sup>, Valentina  
6 Bermudez<sup>2</sup>, William Bush<sup>1</sup> and Xiaofeng Zhu<sup>1</sup>

7 <sup>1\*</sup>Department of Population and Quantitative Health Sciences,  
8 Case Western Reserve University.

9 <sup>2\*</sup>Department of Neurosciences, Case Western Reserve University.

10 \*Corresponding author(s). E-mail(s): [nj196@case.edu](mailto:njl96@case.edu);

11 **Abstract**

12 **Motivation** Nearly two decades of genome-wide association studies  
13 (GWAS) have identify thousands of disease-associated genetic variants,  
14 but very few genes with evidence of causality. Recent methodologi-  
15 cal advances demonstrate that Mendelian Randomization (MR) using  
16 expression quantitative loci (eQTLs) as instrumental variables can  
17 detect potential causal genes. However, existing MR approaches are  
18 not well suited to handle the complexity of eQTL GWAS data struc-  
19 ture and so they are subject to bias, inflation, and incorrect inference.  
20 **Results** We present a whole-genome regulatory network analysis tool  
21 (HORNET), which is a comprehensive set of statistical and compu-  
22 tational tools to perform genome-wide searches for causal genes using  
23 summary level GWAS data that is robust to biases from multiple  
24 sources. Applying HORNET to schizophrenia, we identified differen-  
25 tial magnitudes of gene expression causality . Applying HORNET to  
26 schizophrenia, we identified differential magnitudes of gene expression  
27 causality across different brain tissues. **Availability and Imple-**  
28 **mentation** Freely available at [https://github.com/noahlorinczcomi/](https://github.com/noahlorinczcomi/HORNET)  
29 [HORNET](https://github.com/noahlorinczcomi/HORNET) or Mac, Windows, and Linux users. **Contact** [nj196@case.edu](mailto:njl96@case.edu).

30 **Keywords:** expression quantitative trait loci, multivariable mendelian  
31 randomization, causal genes, schizophrenia

## 32 1 Introduction

33 Genetic epidemiologists have spent decades trying to identify genes that cause  
34 disease [26]. Significant effort has been given to experimental methods [42, 49],  
35 linkage studies [39], genome-wide association studies (GWAS), and functional  
36 annotation of putative disease-associated genetic variants [48]. These methods  
37 of causal validation may be costly, may not always provide causal inference,  
38 and have sometimes produced conflicting results [31]. They also generally can-  
39 not be scaled to efficiently test hundreds or thousands of genes simultaneously.  
40 Cis Mendelian Randomization (*cis*MR) has been proposed as a cost- and time-  
41 efficient alternative to identify potential causal genes and can leverage the  
42 wealth of publicly available summary data from genome-wide association stud-  
43 ies (GWAS) and eQTL studies [22, 40, 51, 60]. In this context, *cis* MR uses  
44 instrumental variables that are gene expression quantitative trait loci (eQTLs)  
45 to estimate tissue-specific causal effects of gene expression on disease risk [19].

46 *Cis* MR methods are similar to transcriptome-wide association study  
47 (TWAS) methods, which test the association between predicted gene expres-  
48 sion and the outcome phenotype. TWAS may suffer from reduced power due to  
49 imprecise estimation of gene expression in the discovery population [12, 32, 52],  
50 and from direct SNP associations with the outcome phenotype, known as hor-  
51 izontal pleiotropy. MR requires only GWAS summary statistics and a range  
52 of robust tools to control the Type I error and bias from horizontal pleiotropy  
53 rate have been developed [28, 34]. The MR-based approach can either con-  
54 sider each gene separately (univariable MR) or jointly with surrounding genes

55 in a regulatory network (multivariable MR). Since it is well known that many  
56 genes are members of large regulatory networks [16, 29], multivariable MR  
57 may be better suited to study multiple gene expressions simultaneously than  
58 univariable MR that study one gene expression and one trait separately, such  
59 as TWAS [33, 34, 44].

60 However, there is currently no unified statistical or computational frame-  
61 work for applying multivariable MR to the study of causal genes. Performing  
62 multivariable MR with summary data from eQTL and disease GWAS (eQTL-  
63 MVMR) has many challenges, including the handling of missing data, linkage  
64 disequilibrium (LD) between eQTLs, gene tissue specification, gene priori-  
65 tization, and causal inference. Without careful attention to each of these  
66 challenges, the simple application of traditional multivariable MR methods to  
67 these data may produce spurious results which may fail in follow-up exper-  
68 imental testing. We present HORNET, a set of bioinformatic tools that can  
69 be used to robustly perform eQTL-MVMR with GWAS summary data. We  
70 demonstrate that existing univariable and multivariable implementations of  
71 eQTL-MR are vulnerable to biases and/or inflated Type I and II error rates  
72 from weak eQTLs, correlated horizontal pleiotropy (CHP), high correlations  
73 between genes, missing data, and misspecified LD structure.

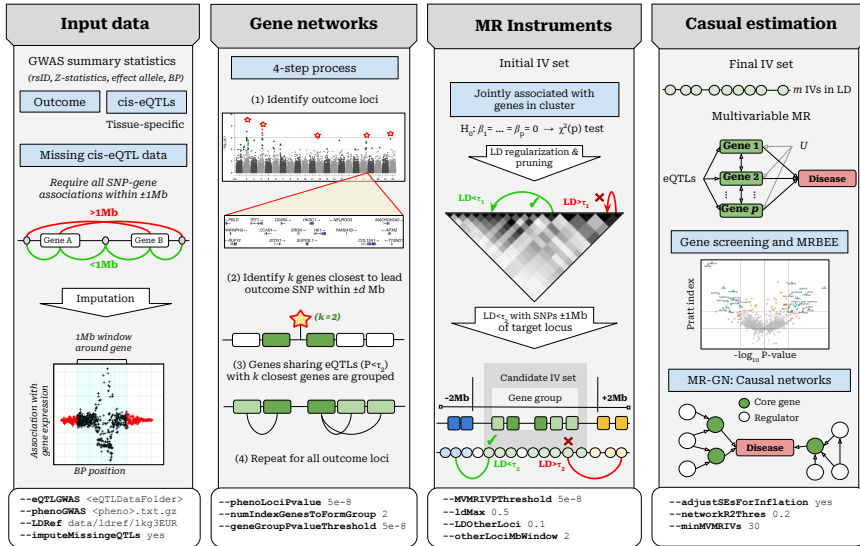

**Fig. 1** Flowchart illustrating genome-wide causal gene searches using HORNET. Example options given to flags that the command line version of HORNET uses are at the bottom of each panel. In the ‘Input data’ section,  $\pm 1\text{Mb}$  is used because it is standard in many publicly available data such as GTEx [10] and eQTLGen [55]. The HORNET software is available from <https://github.com/noahlrinczcomi/HORNET>

## 2 System and Methods

### 2.1 Data

HORNET uses summary level data from GWAS of cis gene expression (eQTL) and a disease phenotype. cis-eQTL GWAS data should generally provide estimates of association between the expression of each gene and all SNPs within  $\pm 1\text{Mb}$  of them. These data are publicly available from consortia such as eQTLGen [54] and the Genotype-Tissue Expression (GTEx) project [10]. Disease GWAS data can typically be downloaded from public repositories such as the GWAS Catalog [46]. HORNET additionally requires an LD reference panel with corresponding .bim, .bed, and .fam files. The 1000 Genomes Phase 3 (1kg) [9] reference panel is automatically included with the HORNET software for African, East Asian, South Asian, European, Hispanic, and trans-ancestry

86 populations, although researches may use their own reference panels such as  
 87 those from the UK Biobank [47].

## 88 2.2 Instrument selection and missing data

89 Selection of the IV set in eQTL-MVMR using standard IV selection meth-  
 90 ods can either reduce statistical power or make estimation of causal effects  
 91 impossible because of the structure of cis-eQTL GWAS summary statistics.  
 92 Univariable eQTL-MR for the  $k$ th gene in a locus of  $p$  genes uses the set  $\mathcal{S}_k$   
 93 of cis-eQTLs as IVs and performs univariable regression [21]. Multivariable  
 94 eQTL-MR in the same locus uses the superset  $\mathcal{S}_\cup = \cup_{k=1}^p \mathcal{S}_k$  and performs  
 95 multivariable regression [40]. Since most publicly available cis-eQTL data only  
 96 contain estimates of association between SNPs and all genes within  $\pm 1\text{Mb}$  of  
 97 them (e.g., [10, 54]), not all SNPs in  $\mathcal{S}_\cup$  may have association estimates that  
 98 are present in the data. An alternative approach is to use the set  $\mathcal{S}_\cap = \cap_{k=1}^p \mathcal{S}_k$   
 99 which contains SNPs with association estimates that are available for all  $p$   
 100 genes. However, this set may contain very few SNPs, if any, for some relatively  
 101 large loci which contain many genes that are co-regulated. If the size of  $\mathcal{S}_\cap$   
 102 is small, there can be limited statistical power for eQTL-MVMR because the  
 103 power in MR is proportional to the total trait variance explained by the IVs  
 104 [34]. Thus, only  $\mathcal{S}_\cup$  is used in HORNET.

105 We propose imputing missing data using one of three approaches that users  
 106 of HORNET can choose between: (i) imputation of missing values with 0s,  
 107 (ii) imputation based only on LD structure between observed and unobserved  
 108 SNPs [43], and (iii) imputation based on a modified matrix completion algo-  
 109 rithm (MV-Imp). Using any of these methods, only estimates of association  
 110 between SNPs and the gene expression phenotype are imputed. The MV-Imp

111 approach in (iii) is applied to SNPs in the union set  $\mathcal{S}_U$  and presented in Algo-  
 112 rithm 1. This approach assumes a low-rank structure of the MR design matrix  
 113 and accounts for estimation error and LD structure. As mentioned, public cis-  
 114 eQTL summary data are generally available for SNP-gene pairs within  $\pm 1\text{Mb}$   
 115 of each other. Using individual-level data from 236 unrelated non-Hispanic  
 116 White subjects, we demonstrate in Figure 4 of the **Supplement** that associa-  
 117 tion estimates outside of the 1Mb window have mean 0 and constant variance  
 118 with high probability. Imputation using MV-Imp imputes data with the lowest  
 119 error in simulation 2, though imputation of missing values with zeros performs  
 120 similarly and is more computationally efficient.

---

**Algorithm 1** Pseudo-code of eQTL imputation.

---

**Require:** The  $m \times p$  incomplete matrix of eQTL association estimates between  $m$  SNPs and expressions of  $p$  genes  $\widehat{\mathbf{B}}$ , the set of missing values  $\mathcal{O}$ , the singular values  $\eta_1 \geq \dots \geq \eta_p$  of the  $p \times p$  weak instrument bias matrix  $m\Sigma_{W_\beta W_\beta}$ , inverse LD matrix  $\Theta$ , tuning parameter  $\lambda$ , tolerance  $\epsilon$ .

1. Initialize  $\widehat{\mathbf{B}}^0 = \Theta^{1/2}\widehat{\mathbf{B}}$  with missing values set to 0
  2. Define  $d_1^0 \geq \dots \geq d_p^0$  as the singular values of  $\widehat{\mathbf{B}}^0 := \mathbf{U}\mathbf{D}\mathbf{V}^\top$
  3. Define  $\alpha = 1 - \sum_{k=1}^p \eta_k / \sum_{k=1}^p d_k^0$
  4. Reconstruct  $\widehat{\mathbf{B}}^0 = \mathbf{U}(\alpha\mathbf{D})\mathbf{V}^\top$ , where  $\mathbf{D} = \text{diag}(\alpha \times d_k^0)_{k=1}^p$
- while**  $\|\widehat{\mathbf{B}}^{(t+1)} - \widehat{\mathbf{B}}^{(t)}\|_F > \epsilon$
- Find  $\mathbf{U}\mathbf{D}\mathbf{V}^\top = \widehat{\mathbf{B}}^{(t)}$  and define the  $k$ th singular value as  $d_k^{(t)}$ ,
  - Threshold singular values,  $d_k^{(t+1)} = (d_k^{(t)} - \lambda)_+$ ; where  $(a)_+ = \max(0, a)$
  - Construct  $\widehat{\mathbf{B}}^{(t+1)} = \mathbf{U}\mathbf{D}^+\mathbf{V}^\top$ , where  $\mathbf{D}^+ = \text{diag}[d_k^{(t+1)}]_{k=1}^p$ ,
  - Set  $\widehat{\mathbf{B}}_{/\mathcal{O}}^{(t+1)} = \widehat{\mathbf{B}}_{/\mathcal{O}}^{(0)}$ ; i.e., only missing values are imputed
- end while**

**Ensure:** Matrix  $\Theta^{-1/2}\widehat{\mathbf{B}}^{(t)}$  with no missing values.

---

After imputating the missing SNP-expression association estimates, the full set of candidate IVs  $\mathcal{S}_U$  is restricted to those that are significant in a joint test of association. Let  $\widehat{\beta}_j$  be the  $p$ -length vector of associations between the  $j$ th eQTL in  $\mathcal{S}_U$  and the expression of  $p$  genes in a tissue, where  $\text{Cov}(\widehat{\beta}_j) := \Sigma$  is estimated using the insignificant eQTL effect estimates [34, Method]. The

initial candidate set  $\mathcal{S}_U$  is restricted to

$$\mathcal{S} = \left\{ j : \widehat{\boldsymbol{\beta}}_j^\top \widehat{\boldsymbol{\Sigma}}^{-1} \widehat{\boldsymbol{\beta}}_j > F_{\chi^2(p)}^{-1}(\alpha) \right\}, \quad (1)$$

121 where  $\alpha = 5 \times 10^{-8}$  by default in the HORNET software. The set  $\mathcal{S}$  is further  
 122 restricted using LD pruning [15, 45] and CHP bias-correction as described in  
 123 the next section.

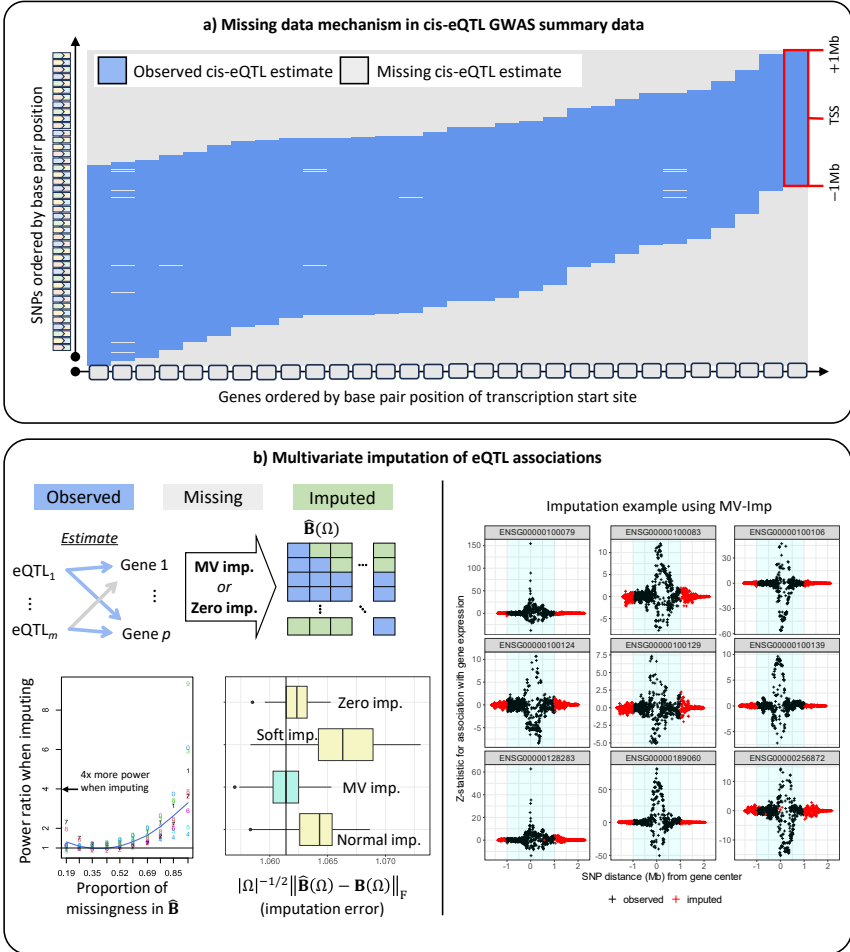

**Fig. 2** This figure illustrates the mechanism in summary cis-eQTL GWAS data that leads to missing data in eQTL-MVMR and how this missing data can be addressed using imputation. a) Only SNP-gene pairs within a defined distance have association estimates present in cis-eQTL summary data. This figure demonstrates this by displaying the available data for SNPs and genes ordered by their chromosomal position using data from the eQTLGen Consortium [54]. b) (left) Visual display of the pattern of missing in the design matrix  $\hat{\mathbf{B}}(\Omega)$  used in eQTL-MVMR. Imputation can be performed by setting missing values to be 0 ('Zero imp.') or by applying the low-rank approximation ('MV imp.') to  $\hat{\mathbf{B}}(\Omega)$  described in Algorithm 1. 'Soft impute' is the soft imputation method of [24] and 'Normal imp.' is a gene-pairwise imputation method based on the multivariate normal distribution, more fully described in the **Supplement**.  $|\Omega|$  is the total number of missing values in a simulation performed using real data in the *CCDC163* gene region. These data were GWAS summary statistics of gene expression in blood tissue measured in 236 unrelated non-Hispanic White individuals. Full details of this simulation are presented in the **Supplement**. (right) An example of the MV imp. method applied to summary data for 9 genes on chromosome 22 using cis-eQTL data from the eQTLGen Consortium [54].



## 2.3 Handling linkage disequilibrium

In nearly all applications of MVMR with eQTL data, an estimate of the LD matrix  $\mathbf{R}$  for a set of eQTLs used as IVs is required. There are at least three primary challenges related to the use of eQTLs that are in LD when only individual-level data from a reference panel is available: (i) LD between causal SNPs can induce a correlated horizontal pleiotropy (CHP) bias (see **Supplement Section 2.1**), (ii) imprecise estimates of LD between the eQTLs can lead to underestimated standard errors of the causal effect estimates (**Supplement Sections 2.4 and 2.6**), (iii) direct application of the estimated LD matrix to MR may be impossible because of non positive definiteness and the choice(s) of regularization [3] may not always be clear. An additional challenge which HORNET does not address is the possibility of differences in the LD structure of the population used in GWAS and the LD reference panel. Figure 3 presents results from simulations demonstrating how this can affect inference using MR. In the next three subsections, we describe these challenges in greater detail and present the solutions that HORNET can implement.

### 2.3.1 Correlated horizontal pleiotropy from LD between eQTLs

CHP can be introduced in eQTL-MVMR if any eQTLs used as IVs in a target locus are in LD with other eQTLs that are not in the IV set. This is a form of confounding that can inflate Type I or II error rates when testing the causal null hypothesis [36, 53]. We account for this CHP by removing IVs in the candidate set  $\mathcal{S}$  that have LD  $r^2 > \kappa$  with other SNPs not in this set but within  $\pm 2\text{Mb}$  of the boundaries of the locus. A visual example of this process is presented in Panel b of Figure 3. In practice, estimation of LD between eQTLs in the IV set and those outside of it is made using the available LD

reference panel. This process will reduce the number of eQTLs available for  
 use in MVMR, since it will remove IVs in LD with neighboring non-IVs, but  
 may provide partial protection against CHP bias.

### 2.3.2 Inflation from misspecified LD

Mis-specifying the LD matrix corresponding to a set of eQTLs that are used as  
 IVs in eQTL-MR can inflate the statistics used to test the causal null hypothesis  
 [28]. Since individual-level data for the discovery GWAS of the disease  
 phenotype are rarely publicly available, eQTL-MR relies on publicly available  
 reference panels to estimate LD between a set of SNPs using populations which  
 are assumed to be similar to the eQTL GWAS population. This LD matrix  
 can be mis-specified when a reference panel of relatively small size and/or dif-  
 ferent genetic ancestry is used, making causal inference using standard MR  
 methods such as IVW [4] or principal components adjustment [5] vulnerable  
 to inflated Type I/II error rates [28]. No solution to this problem currently  
 exists for eQTL-MVMR. We demonstrate in this section that this problem is  
 caused by misspecification of the residual degrees of freedom in the standard  
 t-test for statistical inference of a causal effect.

We therefore propose a t-test which is corrected for misspecification of the  
 LD reference panel. Consider a univariable MR model using  $m$  IVs in which

$$\hat{\theta} = (\hat{\beta}^\top \mathbf{W}^{-1} \hat{\alpha}) / (\hat{\beta}^\top \mathbf{W}^{-1} \hat{\beta}),$$

$$\hat{\alpha} \sim \mathcal{N}(\beta\theta, \mathbf{R}), \quad \mathbf{W} \sim \text{Wishart}_m(n, n^{-1}\mathbf{R}),$$

where  $n$  is the sample size of the LD reference panel. Standard practice to test  
 $H_0 : \theta = 0$  compares  $L = \hat{\theta} / \widehat{\text{SE}}(\hat{\theta})$  to a t-distribution with  $m - 1$  degrees of  
 freedom. This test implicitly assumes that  $(m - 1)\widehat{\text{Var}}(\hat{\theta}) / \text{Var}(\hat{\theta}) \sim \chi^2(m - 1)$ ,

170 when in fact  $\widehat{\text{Var}}(\hat{\theta})/\text{Var}(\hat{\theta}) \sim \chi^2(n - m + 1)$  when  $\mathbf{W}$  is treated as random  
 171 [37]. Assuming  $\text{Var}(\hat{\theta}) = \text{E}(\mathbf{W})$ , the statistic  $L$  has expectation does not follow  
 172 a t-distribution since the residual degrees of freedom is misspecified. However,  
 173  $\tilde{L} = \sqrt{(n - m + 1)/n}L$  does follow a t-distribution with  $m - 1$  degrees of  
 174 freedom. We therefore use the statistic  $\tilde{L}$  to test  $H_0 : \theta = 0$  instead of  $L$ . It  
 175 follows from the definition of  $\tilde{L}$  that  $\tilde{L} \leq L$ , which implies that it may be less  
 176 powerful than  $L$ , but should also control the Type I error rate or  $L$  at the  
 177 nominal level.

### 178 2.3.3 Non-positive definite LD matrix

179 When using a reference panel to estimate LD between a set of eQTLs that  
 180 may be used as IVs in eQTL-MVMR, the raw estimate  $\hat{\mathbf{R}}$  is not guaranteed  
 181 to be positive definite if the size of the reference panel  $n_{\text{ref}}$  is less than the  
 182 number of IVs [20]. LD pruning also does not guarantee this issue will always  
 183 be avoided. In this case, we may not be able to directly use  $\hat{\mathbf{R}}$  because eQTL-  
 184 MVMR requires its inverse, which may not exist. Multiple solutions to this  
 185 problem exist in the literature, with methods either transforming the IV set  
 186 [5, 38, 57] or directly applying regularization to  $\hat{\mathbf{R}}$  [7]. We allow users to either  
 187 apply regularization to  $\hat{\mathbf{R}}$  by a scalar factor which achieves positive definiteness  
 188 with minimal perturbation based on [8], or users may apply LD pruning.

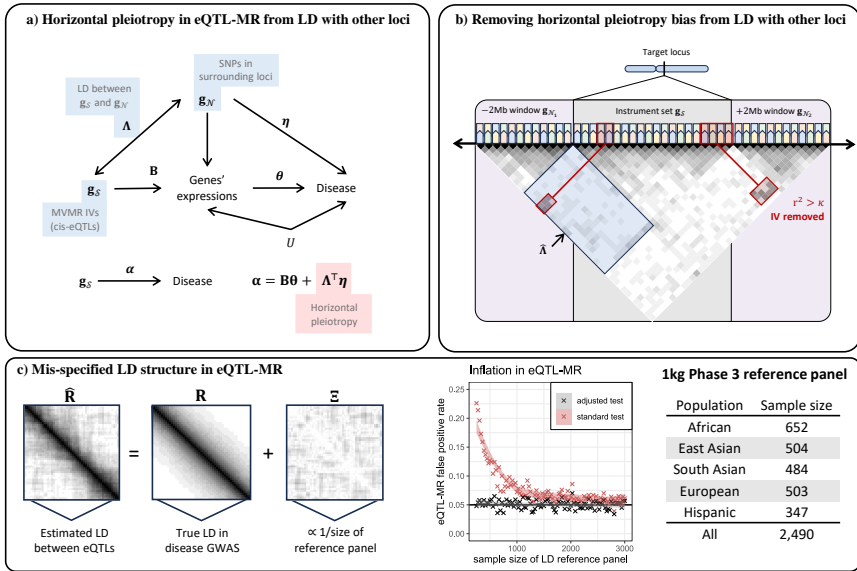

**Fig. 3** This figure illustrates the adjustments for CHP and inflation that are introduced when the eQTLs used in MR are in LD and researchers only have access to relatively small reference panels. a) The goal of eQTL-MVMR is to estimate  $\theta$ , which may be subject to bias when  $\Lambda$  and  $\eta$  are each nonzero. b) This is the CHP-adjustment procedure described in Section 2.3.1. c) Results in the panel entitled ‘Inflation in eQTL-MR’ are from simulation in which the true LD matrix had dimension  $500 \times 500$  and an AR1 structure with correlation parameter 0.5. We applied LD pruning at the threshold  $r^2 < 0.3^2$ . In this simulation, we repeatedly drew an estimate of the LD matrix from a Wishart distribution with degrees of freedom found on the x-axis. The R code used to perform this simulation is available at <https://github.com/noahlorinczcomi/HORNET>.

## 189 2.4 Estimating causal effects

190 HORNET performs multivariable MR (MVMR) in locus by locus across the  
 191 genome. Standard causal inference from MVMR is based on the P-value cor-  
 192 responding to the estimated causal effect. We apply this inference and include  
 193 two additional criteria to prioritize genes based on their significance and esti-  
 194 mated causal effect size. These criteria are the (i) locus R-squared, measuring  
 195 the total contribution of gene expression to phenotypic variation, and (ii) Pratt  
 196 index [2]. The HORNET software uses MRBEE [34] to estimate causal effects  
 197 in a set of genes screened as positive by GScreen, which is introduced in the

198 next subsection. MRBEE performs robust multiple regression and so the cor-  
199 responding variance explained R-squared values can be used to approximately  
200 represent the degree of model fit in a locus. We demonstrate in the **Supple-**  
201 **ment** that the locus R-squared is only equal to the true heritability explained  
202 when the power to detect each causal eQTL is 1. The Pratt index is gene-  
203 specific in a single locus and is used to represent the gene-specific proportion  
204 of variance explained in MVMR. Each locus will have one R-squared value and  
205 each gene in the locus will have its own Pratt index value, the sum of which  
206 across all genes in the locus is theoretically the locus R-squared value. We  
207 introduce the locus R-squared and gene-specific Pratt index values as imperfect  
208 measurements of quantities that are generally of interest when applying HOR-  
209 NET, and assert that the MVMR literature currently lacks any measurement  
210 which intends to capture what these two do.

### 211 2.4.1 Screening genes

212 We stated in the previous section that each gene in a locus is first screened for  
213 evidence of causality then, if passing the screen, their causal effects are esti-  
214 mated using MRBEE. In this section, we briefly introduce the motivation for  
215 and execution of the screening process. In a locus of approximately 2Mb, many  
216 genes may be present (e.g., upwards of 30). Given the restrictions placed on the  
217 structure of cis-eQTL data mentioned in Section 1, the curse of dimensionality  
218 may be frequently encountered, making direct estimation of all causal effects in  
219 a locus by MRBEE challenging. We therefore propose to first screen all genes  
220 in a locus using a variable selection penalty to reduce the dimensionality of  
221 MVMR (see [17], [59]). This step will automatically select a relatively small  
222 subset of genes with the strongest evidence of direct causality of the outcome.  
223 We then apply MRBEE only to the selected genes passing this screening step.  
224 We use a new method called GScreen which approximates median regression

225 using the methods of [25] and applies the unbiased SCAD variable selection  
226 penalty [17]. Section 4 of the **Supplement** provides more details about the  
227 GScreen method and its performance in simulation and application to real  
228 data.

## 229 **2.5 Simulations**

230 We performed three separate simulations to assess the performance of missing  
231 data imputation, inflation in eQTL-MR, and inflation-correction methods. The  
232 setup of each simulation and a discussion of the results they produced are  
233 described in the next three subsections.

### 234 **2.5.1 Imputing missing data**

235 In the missing data simulation, we used summary statistics from eQTL GWAS  
236 for 9 genes on chromosome 1 produced from 236 non-Hispanic White indi-  
237 viduals. We restricted the eQTLs used to only those within  $\pm 2\text{Mb}$  of the  
238 transcription start site (TSS) of one of the genes, producing 526 fully observed  
239 eQTLs. We then set the Z-statistics for eQTL-gene pairs in which the eQTL  
240 was  $> 1\text{Mb}$  from the TSS as missing and evaluated four methods of impu-  
241 tation: (i) MV-Imp, which was the matrix completion approach outlined in  
242 Algorithm 1, (ii) imputation of missing values with 0s, (iii) soft impute [35],  
243 and (iv) imputation based on the multivariate normal distribution. For each  
244 simulation, the true LD correlation matrix  $\mathbf{R}$  between the 526 eQTLs had a  
245 first order autoregressive structure with correlation parameter 0.5. The matrix  
246 of measurement error correlations  $\Sigma_{W_\beta W_\beta}$  was estimated from all SNPs in the  
247 1Mb window with squared Z-statistics for all eQTL associations less than the  
248 95th quantile of a chi-square distribution with one degree of freedom. This  
249 follows the procedures used in practice [34, 61].

250 In simulation, our multivariate imputation method outlined in Algorithm  
 251 1 has smaller estimation error than imputation with all zero values or the  
 252 traditional soft impute method [35]. Estimation error in this setting is defined  
 253 as the difference between true and imputed values. Since there is currently  
 254 no other way to address missing data in eQTL-MVMR, zero-imputation, soft  
 255 impute, and imputation based on the multivariate normal distribution are  
 256 three straightforward alternatives to our proposed imputation approach. We  
 257 demonstrate in Section 1.4 of the **Supplement** and Panel b of Figure 2 that  
 258 imputing missing data using our algorithm can produce up to 2-4x increases  
 259 in power vs excluding eQTLs with any missing associations as IVs.

### 260 2.5.2 Inflation in eQTL-MR

261 In the simulation to demonstrate inflation in eQTL-MR, the true LD matrix  
 262  $\mathbf{R}$  for 500 eQTLs had a first order autoregressive structure with correlation  
 263 parameter 0.50 and was estimated by sampling from a Wishart distribution  
 264 with varying degrees of freedom equal to the reference panel sample size. In  
 265 each simulation, true eQTL and disease standardized effect sizes were drawn  
 266 from independent multivariate normal distributions with means 0 and covari-  
 267 ance matrices  $\mathbf{R}$ . We then applied LD pruning [15, 45] at the threshold  
 268  $r^2 < 0.3^2$  to restrict the IV set used in univariable MR. We performed MR  
 269 using univariable IVW [4] and the Type I error rate was recorded using both  
 270 the standard test statistic  $L$  and the adjusted statistics  $\tilde{L}$  introduced in Section  
 271 2.3.2. The Type I error rate was based on tests of the causal null hypothesis.

272 Panel C in Figure 3 demonstrates that LD reference panels that contained  
 273 genotype information for less than 3,000 individuals inflated the false positive  
 274 rate in eQTL-MVMR using the standard test statistic  $S$ . When the reference  
 275 panel contained 500 individuals, the false positive rate approached 0.25 using  
 276  $S$ . As a comparison, the largest population-stratified sample of individuals in

277 the 1000 Genomes Phase 3 reference sample [9] is 652 and the smallest is 347.  
278 Using our adjusted test statistic  $\tilde{S}$ , the Type I error rate was controlled at the  
279 nominal level for LD reference panels of any size, providing support that this  
280 method of hypothesis testing may not have inflated Type I error.

## 281 **3 Implementation**

### 282 **3.0.1 Software**

283 HORNET requires GWAS summary statistics for gene expression and a disease  
284 phenotype and an LD reference panel. LD estimation from a reference panel  
285 for a set of eQTLs is made using the PLINK software [41], which requires the  
286 presence of `.bim`, `.bed`, and `.fam` files. eQTL GWAS data must contain a single  
287 file for each chromosome and generally should contain summary statistics for  
288 all genotyped SNPs within a cis-region of each available gene. These data are  
289 available for blood tissue from the eQTLGen Consortium (n=31k) [54] and the  
290 GTEx consortium for 53 other tissues (n<706) [10]. To help researchers identify  
291 relevant tissues to select in their analyses, we provide a tissue prioritizing tool  
292 based on the heritability of eQTL signals. This tool receives a list of target  
293 genes from the researcher and returns a ranked list of tissues in which each  
294 target gene has the strongest eQTLs using GTEx v8 summary data [10]. See  
295 **Supplement Section 4** for additional details and a demonstration of how to  
296 use this tool.

297 The HORNET software exists as a command line program available for  
298 Linux, Windows, and Mac machines. Its tutorial is available at <https://github.com/noahlorinczcomi/HORNET>  
299 and is introduced briefly in **Supplement**  
300 **Section 5**. By downloading HORNET, users also receive PLINK v1.9 [41]  
301 and LD reference panels for European, African, East and South Asian, His-  
302 panic, and trans-ethnic populations from 1000 Genomes Phase 3 (1kg) [9].



303 By default, our software uses this reference panel from the entire 1kg sample  
304 to estimate LD in the eQTL GWAS population, but users can alternatively  
305 specify a specific sub-population in 1kg or even use their own LD reference  
306 panels.

### 307 **3.1 Real data analysis with schizophrenia**

308 We applied the HORNET methods and software to the analysis of genes whose  
309 expression in basal ganglia, cerebellum, cortex, hippocampus, amygdala, and  
310 blood tissues cause schizophrenia risk. Schizophrenia GWAS data were from  
311 [50], which included 130k European individuals and were primarily from the  
312 Psychiatric Genomics Consortium (PGC) core data set. eQTL GWAS data  
313 in brain tissue were from [13], which contained GWAS data from European  
314 samples of sizes 208 for basal ganglia, 492 for cerebellum, 2,683 for cortex,  
315 168 for hippocampus, and 86 for amygdala tissue. eQTL GWAS data in blood  
316 were from the eQTLGen Consortium [54] for 31k predominantly European  
317 individuals. We performed analyses with HORNET in all schizophrenia loci  
318 with at least one P-value less than 0.005, grouped genes sharing eQTLs with  
319 P-values less than 0.001, applied LD pruning at the threshold  $r^2 < 0.7^2$ , and  
320 removed SNPs in LD with any IVs in the target locus beyond  $r^2 > 0.5^2$  in  
321 a 1Mb window. Finally, all IVs had a P-value for joint association with gene  
322 expression across all tissues which was less than  $5 \times 10^{-3}$  in the test of Equation  
323 1. We performed HORNET in each tissue separately and present the results  
324 in Figure 4.

325 Figure 4 uses the data described above to provide examples of the primary  
326 results produced by genome-wide analysis with HORNET, including causal  
327 estimates for prioritized genes, genome-wide R-squared and Pratt index values

328 for each tissue, and an estimated sparse regulatory network of genetic cor-  
329 relations using graphical lasso [18]. These results show that locus R-squared  
330 values can exceed 0.50 for many loci, suggesting that SNP associations with  
331 schizophrenia in these loci may be primarily explained by gene expression in  
332 brain tissue (Panel c). For example, 17.2% of genetic variation in schizophrenia  
333 in the *KCTD13* locus is explained by the expression of genes in blood tissue,  
334 75.2% in the cerebellum, and 59.4% in the cortex. In this locus, we observed  
335 that expression of the *INO80E* gene in the cortex increased schizophrenia risk  
336 ( $P = 2.1 \times 10^{-9}$ ), but that the specific schizophrenia variation attributable  
337 to this effect was small (Pratt index=0.09). Alternatively, expression of the  
338 *DOC2A* gene in the cortex was strongly associated with increased schizophre-  
339 nia risk ( $P < 10^{-50}$ ) and also had a relatively large Pratt index value of 0.67  
340 (Panels b and d), suggesting that *DOC2A* is potentially a better gene target  
341 than *INO80E* in the cortex.

342 We attempted to better understand the complex regulatory network  
343 that exists in the human leukocyte antigen (HLA) complex of 6p21.33 [30].  
344 Genetic variants in this region are highly associated with risk of schizophrenia  
345 [11, 23, 27, 27] and many other traits such as brain morphology [6], autism spec-  
346 trum disorder [1], and Type II diabetes [56]. The HORNET software applied  
347 graphical lasso [18] to the matrix of imputed marginal Z-statistics to uncover  
348 regulatory relationships between 18 genes in this locus and their pathways  
349 of causal effect on schizophrenia risk when expressed in cerebellum tissue.  
350 These results suggest a densely connected gene regulatory network in which  
351 the *HLA-C* gene is a so-called ‘regulatory hub’ [14, 58]. The *HLA-C* gene is  
352 directly associated with the regulation of 8 other genes and is indirectly asso-  
353 ciated with the regulation of all genes in the locus except *OR2J3*. Only *HLA-C*  
354 and *FLOT1* have direct causal effects on schizophrenia risk, and all other 15

355 peripheral genes (*OR2J3* excluded) have causal effects on schizophrenia that  
 356 only are mediated by *FLOT1* and/or *HLA-C* expression.

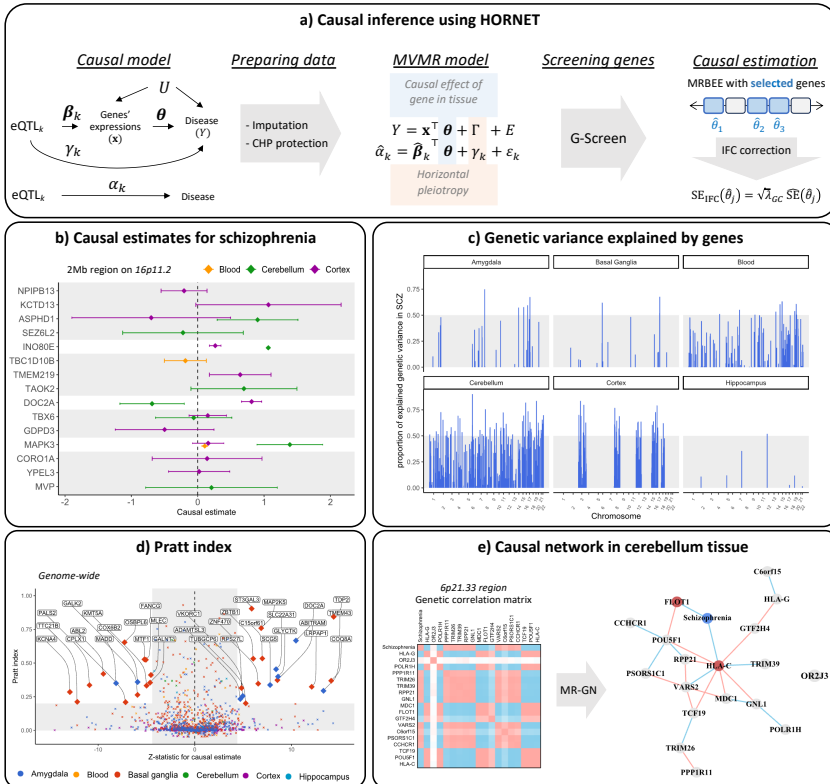

**Fig. 4** This figure presents the results of using HORNET to search for genes modifying schizophrenia risk when expressed in different tissues. a) Description of the causal model, MVMR model, and estimator. b) Causal estimates for multiple genes in blood, cerebellum, and cortex tissues in the schizophrenia-associated *KCTD13* locus. c) R-squared values from MVMR models fitted across the genome. Areas in which no R-squared values exist either had no genes prioritized by GScreen or had insufficient eQTL signals to perform MVMR. d) Pratt index values for all causal estimates made for all tissues. Pratt index values outside the range of (-0.1,1) are not shown. This may happen because of large variability in univariable MR estimates for some loci. e) Estimated gene regulatory and schizophrenia causal network for 18 genes in the schizophrenia-associated *FLOT1* locus of the HLA complex graphical lasso [18].

## 4 Discussion

Existing methods for finding causal genes using multivariable Mendelian Randomization (MR) with GWAS summary statistics are generally vulnerable to bias and inflation from missing data, misspecified LD structure, and confounding by other genes. Equally, no flexible and comprehensive set of computational tools to robustly perform this task current exists. We introduced a suite of statistical and computational tools in the HORNET software that addresses these common challenges in multivariable MR using eQTL GWAS data. HORNET can generally provide unbiased causal estimation and robust inference across a range of real-world conditions in which existing methods in alternative software packages may not. HORNET is a command line tool that can be downloaded from <https://github.com/noahlorinczcomi/HORNET>, where users will also find detailed tutorials demonstrating how to use HORNET.

## 5 Acknowledgements

This work was supported by [grant numbers HG011052, HG011052-03S1] (to X.Z.) from the National Human Genome Research Institute (NHGRI). NLC was partially supported by [grant number T32 HL007567] from the National Heart, Lung, and Blood Institute (NHLBI).

## References

- [1] Meta-analysis of gwas of over 16,000 individuals with autism spectrum disorder highlights a novel locus at 10q24. 32 and a significant overlap with schizophrenia. *Molecular autism*, 8:1–17, 2017.
- [2] Hugues Aschard. A perspective on interaction effects in genetic association studies. *Genetic epidemiology*, 40(8):678–688, 2016.

- 381 [3] Peter J Bickel and Elizaveta Levina. Regularized estimation of large  
382 covariance matrices. *Ann. Stat.*, 36(1):199–227, 2008.
- 383 [4] Stephen Burgess and Jack Bowden. Integrating summarized data from  
384 multiple genetic variants in mendelian randomization: bias and cover-  
385 age properties of inverse-variance weighted methods. *arXiv preprint*  
386 *arXiv:1512.04486*, 2015.
- 387 [5] Stephen Burgess, Verena Zuber, Elsa Valdes-Marquez, Benjamin B Sun,  
388 and Jemma C Hopewell. Mendelian randomization with fine-mapped  
389 genetic data: choosing from large numbers of correlated instrumental  
390 variables. *Genetic epidemiology*, 41(8):714–725, 2017.
- 391 [6] Ming-Huei Chen, Laura M Raffield, Abdou Mousas, Saori Sakaue, Jen-  
392 nifer E Huffman, Arden Moscati, Bhavi Trivedi, Tao Jiang, Parsa Akbari,  
393 Dragana Vuckovic, et al. Trans-ethnic and ancestry-specific blood-cell  
394 genetics in 746,667 individuals from 5 global populations. *Cell*, 182(5):  
395 1198–1213, 2020.
- 396 [7] Qing Cheng, Xiao Zhang, Lin S Chen, and Jin Liu. Mendelian ran-  
397 domization accounting for complex correlated horizontal pleiotropy while  
398 elucidating shared genetic etiology. *Nat. Commun.*, 13(1):1–13, 2022.
- 399 [8] Young-Geun Choi, Johan Lim, Anindya Roy, and Junyong Park. Fixed  
400 support positive-definite modification of covariance matrix estimators via  
401 linear shrinkage. *Journal of Multivariate Analysis*, 171:234–249, 2019.
- 402 [9] 1000 Genomes Project Consortium et al. A global reference for human  
403 genetic variation. *Nature*, 526(7571):68, 2015.

- 404 [10] GTEx Consortium, Kristin G Ardlie, David S Deluca, Ayellet V Segrè,  
405 Timothy J Sullivan, Taylor R Young, Ellen T Gelfand, Casandra A Trow-  
406 bridge, Julian B Maller, Taru Tukiainen, et al. The genotype-tissue  
407 expression (gtex) pilot analysis: multitissue gene regulation in humans.  
408 *Science*, 348(6235):648–660, 2015.
- 409 [11] SPGWAS Consortium. Genome-wide association study identifies five new  
410 schizophrenia loci. *Nat Genet*, 43(10):969–976, 2011.
- 411 [12] Qile Dai, Geyu Zhou, Hongyu Zhao, Urmo Võsa, Lude Franke, Alexis  
412 Battle, Alexander Teumer, Terho Lehtimäki, Olli T Raitakari, Tõnu  
413 Esko, et al. Otters: a powerful twas framework leveraging summary-level  
414 reference data. *Nature Communications*, 14(1):1271, 2023.
- 415 [13] Niek de Klein, Ellen A Tsai, Martijn Vochteloo, Denis Baird, Yunfeng  
416 Huang, Chia-Yen Chen, Sipko van Dam, Roy Oelen, Patrick Deelen,  
417 Olivier B Bakker, et al. Brain expression quantitative trait locus and  
418 network analyses reveal downstream effects and putative drivers for  
419 brain-related diseases. *Nature genetics*, 55(3):377–388, 2023.
- 420 [14] Wenping Deng, Kui Zhang, Sanzhen Liu, Patrick X Zhao, Shizhong Xu,  
421 and Hairong Wei. Jrmgrn: joint reconstruction of multiple gene regulatory  
422 networks with common hub genes using data from multiple tissues or  
423 conditions. *Bioinformatics*, 34(20):3470–3478, 2018.
- 424 [15] Frank Dudbridge and Paul J Newcombe. Accuracy of gene scores when  
425 pruning markers by linkage disequilibrium. *Human heredity*, 80(4):178–  
426 186, 2016.

- 427 [16] Frank Emmert-Streib, Matthias Dehmer, and Benjamin Haibe-Kains.  
428 Gene regulatory networks and their applications: understanding biolog-  
429 ical and medical problems in terms of networks. *Frontiers in cell and*  
430 *developmental biology*, 2:38, 2014.
- 431 [17] Jianqing Fan and Runze Li. Variable selection via nonconcave penalized  
432 likelihood and its oracle properties. *Journal of the American statistical*  
433 *Association*, 96(456):1348–1360, 2001.
- 434 [18] Jerome Friedman, Trevor Hastie, and Robert Tibshirani. Sparse inverse  
435 covariance estimation with the graphical lasso. *Biostatistics*, 9(3):432–441,  
436 2008.
- 437 [19] Dipender Gill, Marios K Georgakis, Venexia M Walker, A Floriaan  
438 Schmidt, Apostolos Gkatzionis, Daniel F Freitag, Chris Finan, Aroon D  
439 Hingorani, Joanna MM Howson, Stephen Burgess, et al. Mendelian ran-  
440 domization for studying the effects of perturbing drug targets. *Wellcome*  
441 *open research*, 6, 2021.
- 442 [20] Apostolos Gkatzionis, Stephen Burgess, and Paul J Newcombe. Statistical  
443 methods for cis-mendelian randomization. *arXiv e-prints*, pages arXiv-  
444 2101, 2021.
- 445 [21] Apostolos Gkatzionis, Stephen Burgess, and Paul J Newcombe. Statistical  
446 methods for cis-mendelian randomization with two-sample summary-level  
447 data. *Genetic epidemiology*, 47(1):3–25, 2023.
- 448 [22] Kevin J Gleason, Fan Yang, and Lin S Chen. A robust two-sample  
449 transcriptome-wide mendelian randomization method integrating gwas  
450 with multi-tissue eqtl summary statistics. *Genetic epidemiology*, 45(4):

451 353–371, 2021.

452 [23] Fernando S Goes, John McGrath, Dimitrios Avramopoulos, Paula  
453 Wolyniec, Mehdi Pirooznia, Ingo Ruczinski, Gerald Nestadt, Eimear E  
454 Kenny, Vladimir Vacic, Inga Peters, et al. Genome-wide association study  
455 of schizophrenia in ashkenazi jews. *American Journal of Medical Genetics*  
456 *Part B: Neuropsychiatric Genetics*, 168(8):649–659, 2015.

457 [24] Trevor Hastie, Rahul Mazumder, Jason D Lee, and Reza Zadeh. Matrix  
458 completion and low-rank svd via fast alternating least squares. *The*  
459 *Journal of Machine Learning Research*, 16(1):3367–3402, 2015.

460 [25] Xuming He, Xiaou Pan, Kean Ming Tan, and Wen-Xin Zhou. Smoothed  
461 quantile regression with large-scale inference. *Journal of Econometrics*,  
462 232(2):367–388, 2023.

463 [26] Farhad Hormozdiari, Gleb Kichaev, Wen-Yun Yang, Bogdan Pasaniuc,  
464 and Eleazar Eskin. Identification of causal genes for complex traits.  
465 *Bioinformatics*, 31(12):i206–i213, 2015.

466 [27] Masashi Ikeda, Atsushi Takahashi, Yoichiro Kamatani, Yukihide  
467 Momozawa, Takeo Saito, Kenji Kondo, Ayu Shimasaki, Kohei Kawase,  
468 Takaya Sakusabe, Yoshimi Iwayama, et al. Genome-wide association  
469 study detected novel susceptibility genes for schizophrenia and shared  
470 trans-populations/diseases genetic effect. *Schizophrenia bulletin*, 45(4):  
471 824–834, 2019.

472 [28] Lin Jiang, Lin Miao, Guorong Yi, Xiangyi Li, Chao Xue, Mulin Jun Li,  
473 Hailiang Huang, and Miaoxin Li. Powerful and robust inference of com-  
474 plex phenotypes’ causal genes with dependent expression quantitative loci



- 475 by a median-based mendelian randomization. *The American Journal of*  
476 *Human Genetics*, 109(5):838–856, 2022.
- 477 [29] Guy Karlebach and Ron Shamir. Modelling and analysis of gene reg-  
478 ulatory networks. *Nature reviews Molecular cell biology*, 9(10):770–780,  
479 2008.
- 480 [30] JAN Klein and Akie Sato. The hla system. *New England journal of*  
481 *medicine*, 343(10):702–709, 2000.
- 482 [31] Cutler T Lewandowski, Juan Maldonado Weng, and Mary Jo LaDu.  
483 Alzheimer’s disease pathology in apoe transgenic mouse models: the who,  
484 what, when, where, why, and how. *Neurobiology of disease*, 139:104811,  
485 2020.
- 486 [32] Yanyu Liang, Festus Nyasimi, and Hae Kyung Im. On the problem of  
487 inflation in transcriptome-wide association studies. *bioRxiv*, pages 2023–  
488 10, 2023.
- 489 [33] Zhaotong Lin, Haoran Xue, and Wei Pan. Robust multivariable mendelian  
490 randomization based on constrained maximum likelihood. *The American*  
491 *Journal of Human Genetics*, 110(4):592–605, 2023.
- 492 [34] Noah Lorincz-Comi, Yihe Yang, Gen Li, and Xiaofeng Zhu. Mrbee: A  
493 bias-corrected multivariable mendelian randomization method. *Human*  
494 *Genetics and Genomics Advances*, page 100290, 2024.
- 495 [35] Rahul Mazumder, Trevor Hastie, and Robert Tibshirani. Spectral regu-  
496 larization algorithms for learning large incomplete matrices. *The Journal*  
497 *of Machine Learning Research*, 11:2287–2322, 2010.

- 498 [36] Jean Morrison, Nicholas Knoblauch, Joseph H Marcus, Matthew  
499 Stephens, and Xin He. Mendelian randomization accounting for corre-  
500 lated and uncorrelated pleiotropic effects using genome-wide summary  
501 statistics. *Nature genetics*, 52(7):740–747, 2020.
- 502 [37] Parimal Mukhopadhyay. *Multivariate statistical analysis*. World Scien-  
503 tific, 2009.
- 504 [38] Paul J Newcombe, David V Conti, and Sylvia Richardson. Jam: a scalable  
505 bayesian framework for joint analysis of marginal snp effects. *Genetic  
506 epidemiology*, 40(3):188–201, 2016.
- 507 [39] Jurg Ott, Jing Wang, and Suzanne M Leal. Genetic linkage analysis in  
508 the age of whole-genome sequencing. *Nature Reviews Genetics*, 16(5):  
509 275–284, 2015.
- 510 [40] Eleonora Porcu, Sina Rüeger, Kaido Lepik, Federico A Santoni, Alexandre  
511 Reymond, and Zoltán Kutalik. Mendelian randomization integrating gwas  
512 and eqtl data reveals genetic determinants of complex and clinical traits.  
513 *Nature communications*, 10(1):3300, 2019.
- 514 [41] Shaun Purcell, Benjamin Neale, Kathe Todd-Brown, Lori Thomas,  
515 Manuel AR Ferreira, David Bender, Julian Maller, Pamela Sklar, Paul IW  
516 De Bakker, Mark J Daly, et al. Plink: a tool set for whole-genome asso-  
517 ciation and population-based linkage analyses. *The American journal of  
518 human genetics*, 81(3):559–575, 2007.
- 519 [42] DA Rees and JC Alcolado. Animal models of diabetes mellitus. *Diabetic  
520 medicine*, 22(4):359–370, 2005.

- 521 [43] Sina Rüeger, Aaron McDavid, and Zoltán Kutalik. Evaluation and appli-  
522 cation of summary statistic imputation to discover new height-associated  
523 loci. *PLoS genetics*, 14(5):e1007371, 2018.
- 524 [44] Eleanor Sanderson. Multivariable mendelian randomization and medi-  
525 ation. *Cold Spring Harbor perspectives in medicine*, page a038984,  
526 2020.
- 527 [45] Amand F Schmidt, Chris Finan, Maria Gordillo-Marañón, Folkert W  
528 Asselbergs, Daniel F Freitag, Riyaz S Patel, Benoît Tyl, Sandesh Chopade,  
529 Rupert Faraway, Magdalena Zwierzyzna, et al. Genetic drug target val-  
530 idation using mendelian randomisation. *Nature communications*, 11(1):  
531 3255, 2020.
- 532 [46] Elliot Sollis, Abayomi Mosaku, Ala Abid, Annalisa Buniello, Maria  
533 Cerezo, Laurent Gil, Tudor Groza, Osman Güneş, Peggy Hall, James Hay-  
534 hurst, et al. The nhgri-ebi gwas catalog: knowledgebase and deposition  
535 resource. *Nucleic acids research*, 51(D1):D977–D985, 2023.
- 536 [47] Cathie Sudlow, John Gallacher, Naomi Allen, Valerie Beral, Paul Burton,  
537 John Danesh, Paul Downey, Paul Elliott, Jane Green, Martin Landray,  
538 et al. Uk biobank: an open access resource for identifying the causes of a  
539 wide range of complex diseases of middle and old age. *PLoS Med.*, 12(3):  
540 e1001779, 2015.
- 541 [48] Patrick F Sullivan, Jennifer RS Meadows, Steven Gazal, BaDoi N Phan,  
542 Xue Li, Diane P Genereux, Michael X Dong, Matteo Bianchi, Gregory  
543 Andrews, Sharadha Sakthikumar, et al. Leveraging base-pair mammalian  
544 constraint to understand genetic variation and human disease. *Science*,  
545 380(6643):eabn2937, 2023.

- 546 [49] Leon M Tai, Katherine L Youmans, Lisa Jungbauer, Chunjiang Yu,  
547 Mary Jo LaDu, et al. Introducing human apoe into  $\alpha\beta$  transgenic mouse  
548 models. *International journal of Alzheimer's disease*, 2011, 2011.
- 549 [50] Vassily Trubetskoy, Antonio F Pardiñas, Ting Qi, Georgia Panagio-  
550 taropoulou, Swapnil Awasthi, Tim B Bigdeli, Julien Bryois, Chia-Yen  
551 Chen, Charlotte A Dennison, Lynsey S Hall, et al. Mapping genomic  
552 loci implicates genes and synaptic biology in schizophrenia. *Nature*, 604  
553 (7906):502–508, 2022.
- 554 [51] Adriaan van Der Graaf, Annique Claringbould, Antoine Rimbert, BIOS  
555 Consortium Heijmans Bastiaan T. 8 Hoen Peter AC't 9 van Meurs Joyce  
556 BJ 10 Jansen Rick 11 Franke Lude 1 2, Harm-Jan Westra, Yang Li,  
557 Cisca Wijmenga, and Serena Sanna. Mendelian randomization while  
558 jointly modeling cis genetics identifies causal relationships between gene  
559 expression and lipids. *Nature communications*, 11(1):4930, 2020.
- 560 [52] Maarten van Iterson, Erik W van Zwet, Bios Consortium, and Bastiaan T  
561 Heijmans. Controlling bias and inflation in epigenome-and transcriptome-  
562 wide association studies using the empirical null distribution. *Genome*  
563 *biology*, 18:1–13, 2017.
- 564 [53] Marie Verbanck, Chia-Yen Chen, Benjamin Neale, and Ron Do. Detection  
565 of widespread horizontal pleiotropy in causal relationships inferred from  
566 mendelian randomization between complex traits and diseases. *Nature*  
567 *genetics*, 50(5):693–698, 2018.
- 568 [54] Urmo Võsa, Annique Claringbould, Harm-Jan Westra, Marc Jan Bonder,  
569 Patrick Deelen, Biao Zeng, Holger Kirsten, Ashis Saha, Roman Kreuzhu-  
570 ber, Silva Kasela, et al. Unraveling the polygenic architecture of complex

- 571 traits using blood eqtl metaanalysis. *BioRxiv*, page 447367, 2018.
- 572 [55] Urmo Võsa, Annique Claringbould, Harm-Jan Westra, Marc Jan Bonder,  
573 Patrick Deelen, Biao Zeng, Holger Kirsten, Ashis Saha, Roman Kreuzhu-  
574 ber, Seyhan Yazar, et al. Large-scale cis-and trans-eqtl analyses identify  
575 thousands of genetic loci and polygenic scores that regulate blood gene  
576 expression. *Nature genetics*, 53(9):1300–1310, 2021.
- 577 [56] Marijana Vujkovic, Jacob M Keaton, Julie A Lynch, Donald R Miller,  
578 Jin Zhou, Catherine Tcheandjieu, Jennifer E Huffman, Themistocles L  
579 Assimes, Kimberly Lorenz, Xiang Zhu, et al. Discovery of 318 new risk  
580 loci for type 2 diabetes and related vascular outcomes among 1.4 million  
581 participants in a multi-ancestry meta-analysis. *Nature genetics*, 52(7):  
582 680–691, 2020.
- 583 [57] Jian Yang, Teresa Ferreira, Andrew P Morris, Sarah E Medland,  
584 Genetic Investigation of ANthropometric Traits (GIANT) Consortium,  
585 DIAbetes Genetics Replication, Meta analysis (DIAGRAM) Consortium,  
586 Pamela AF Madden, Andrew C Heath, Nicholas G Martin, Grant W  
587 Montgomery, et al. Conditional and joint multiple-snp analysis of  
588 gwas summary statistics identifies additional variants influencing complex  
589 traits. *Nature genetics*, 44(4):369–375, 2012.
- 590 [58] Donghyeon Yu, Johan Lim, Xinlei Wang, Faming Liang, and Guanghua  
591 Xiao. Enhanced construction of gene regulatory networks using hub gene  
592 information. *BMC bioinformatics*, 18(1):1–20, 2017.
- 593 [59] Cun-Hui Zhang. Nearly unbiased variable selection under minimax  
594 concave penalty. 2010.

- 595 [60] Anqi Zhu, Nana Matoba, Emma P Wilson, Amanda L Tapia, Yun Li,  
596 Joseph G Ibrahim, Jason L Stein, and Michael I Love. Mrlocus: Identifying  
597 causal genes mediating a trait through bayesian estimation of allelic  
598 heterogeneity. *PLoS genetics*, 17(4):e1009455, 2021.
- 599 [61] Xiaofeng Zhu, Tao Feng, Bamidele O Tayo, Jingjing Liang, J Hunter  
600 Young, Nora Franceschini, Jennifer A Smith, Lisa R Yanek, Yan V Sun,  
601 Todd L Edwards, et al. Meta-analysis of correlated traits via summary  
602 statistics from gwas with an application in hypertension. *Am. J. Hum.*  
603 *Genet.*, 96(1):21–36, 2015.
